# Supplementary material for: Synthesis of porous NiO/CeO2 hybrid nanoflake arrays as a platform for electrochemical biosensing
Source: Royal Society of Chemistry journal article supplement (doi:10.1039/c5nr05924k), 2015-11-26
Supplement: c5nr05924k1.pdf [file c5nr05924k1.pdf]

## Supporting Information

### **Synthesis of porous NiO/CeO<sub>2</sub> hybrid nanoflake arrays as platform for electrochemical biosensing**

**Jiewu Cui<sup>\*a,b</sup>, Jinbao Luo<sup>a</sup>, Bangguo Peng<sup>a,b</sup>, Xinyi Zhang<sup>\*b</sup>, Yong Zhang<sup>a,b</sup>, Yan  
Wang<sup>a,b</sup>, Yongqiang Qin<sup>a</sup>, Hongmei Zheng<sup>a</sup>, Xia Shu<sup>a,b</sup> and Yucheng Wu<sup>\*a,b</sup>**

<sup>a</sup> School of Materials Science and Engineering, Hefei University of Technology, Hefei, 230009,  
China

<sup>b</sup> Key Laboratory of Advanced Functional Materials and Devices of Anhui Province, Hefei,  
230009, China

Author to whom any correspondence should be addressed, e-mail: ycwu@hfut.edu.cn, Fax: +86-  
551-62904517, Tel: +86-551-62901012

## Experimental details

### *Materials synthesis:*

Porous NiO/CeO<sub>2</sub> nanoflake arrays (NFAs) were fabricated by hydrothermal method on Ni foam. Prior to synthesis of NiO/CeO<sub>2</sub> NFAs, Ni foam (2 cm × 3 cm) was rinsed with ethanol and Milli-Q water (18.25 MΩ·cm) alternatively. And then it was immersed into 3 M HCl overnight to remove the surface oxide layer. To synthesize the NiO/CeO<sub>2</sub> NFAs, 35 mL mixture solution with different concentrations of Ce(NO<sub>3</sub>)<sub>3</sub>, NH<sub>4</sub>F and CO(NH)<sub>2</sub> was prepared and subsequently transferred to a 50 mL Teflon vessel with an autoclavable screw cap. The pre-treated Ni foam was immersed into the 35 mL mixture solution. Afterwards, the autoclave was heated to different temperatures for different time inside a conventional oven. The samples were washed repeatedly with Milli-Q water and annealed at 500°C for 2h in air. The influence of Ce(NO<sub>3</sub>)<sub>3</sub>, NH<sub>4</sub>F and CO(NH)<sub>2</sub> concentrations, temperature and time of hydrothermal process on the morphology of the products was investigated and discussed in detail in this communication.

### *Materials Characterization:*

The as-prepared samples were characterized by field emission scanning electron microscopy (SU8020, Hitachi, Japan), X-ray diffraction (D/MAX2500V, Rigaku, Japan), transmission electron microscopy (JEM-2100F, JEOL, Japan). X-ray photoelectron spectrum (ESCALAB250, Thermo, US) was also employed to analyze the elemental status of the NiO/CeO<sub>2</sub> NFAs.

### *Fabrication of glucose biosensor and electrochemical measurements*

Glucose biosensor was fabricated according to our previously reported method<sup>1</sup>. Typically, 50 μL mixture solution with 4.5 v/v% glutaraldehyde, 4.8 w/v% bovine serum albumin and 200 U/mL glucose oxidase was freshly prepared, subsequently a slice of Ni foam (geometry area: 0.1 cm<sup>2</sup>) with porous NiO/CeO<sub>2</sub> NFAs was immersed into the mixture solution and dried in air for 2 h.

Cyclic voltammograms, electrochemical impedance spectrum and chronoamperometry were carried out on autolab PGSTAT 302N electrochemical workstation with a conventional three electrode system. Enzyme modified porous NiO/CeO<sub>2</sub> NFAs on Ni foam, Ag/AgCl (3M KCl) and Pt/Ti were used as working electrode, reference electrode and counter electrode, respectively.

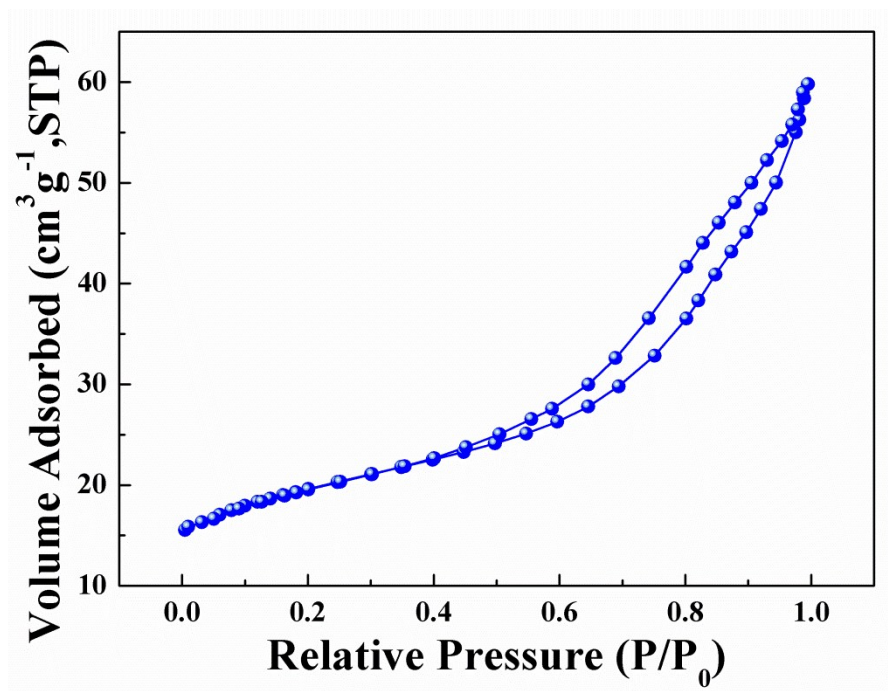

Fig. S1 N<sub>2</sub> adsorption and desorption isotherm of NiO/CeO<sub>2</sub> hybrid nanoflake arrays

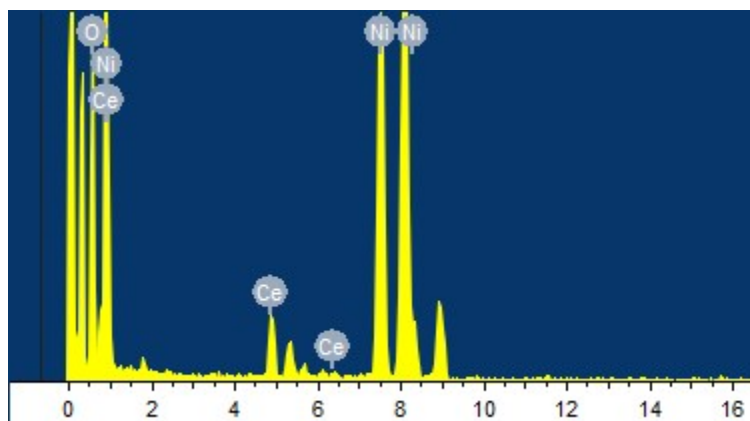

Fig. S2 EDS analysis of an individual NiO/CeO<sub>2</sub> hybrid nanoflake

Table S1 Elemental composition in an individual NiO/CeO<sub>2</sub> hybrid nanoflake

| Element | Weight percentage | Atomic percentage |
|---------|-------------------|-------------------|
| O K     | 26.65             | 61.57             |
| Ni K    | 52.16             | 32.84             |
| Ce L    | 21.19             | 5.59              |
| Total   | 100.00            |                   |

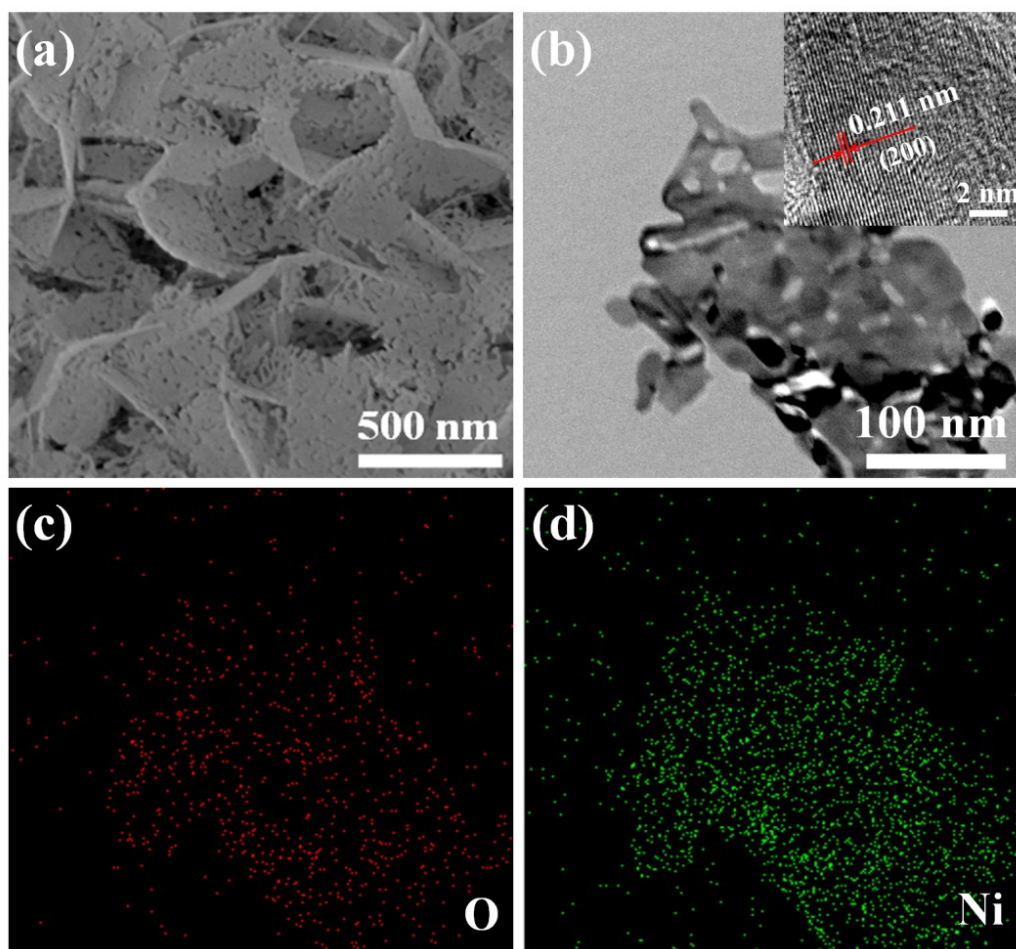

Fig. S3 (a) SEM image of NiO nanoflake arrays. (b) TEM image of a single NiO nanoflake, inset is the HRTEM image of corresponding single NiO nanoflake. Elemental distribution of O (c) and Ni (d) in a single NiO nanoflake in Fig. S3 (b).

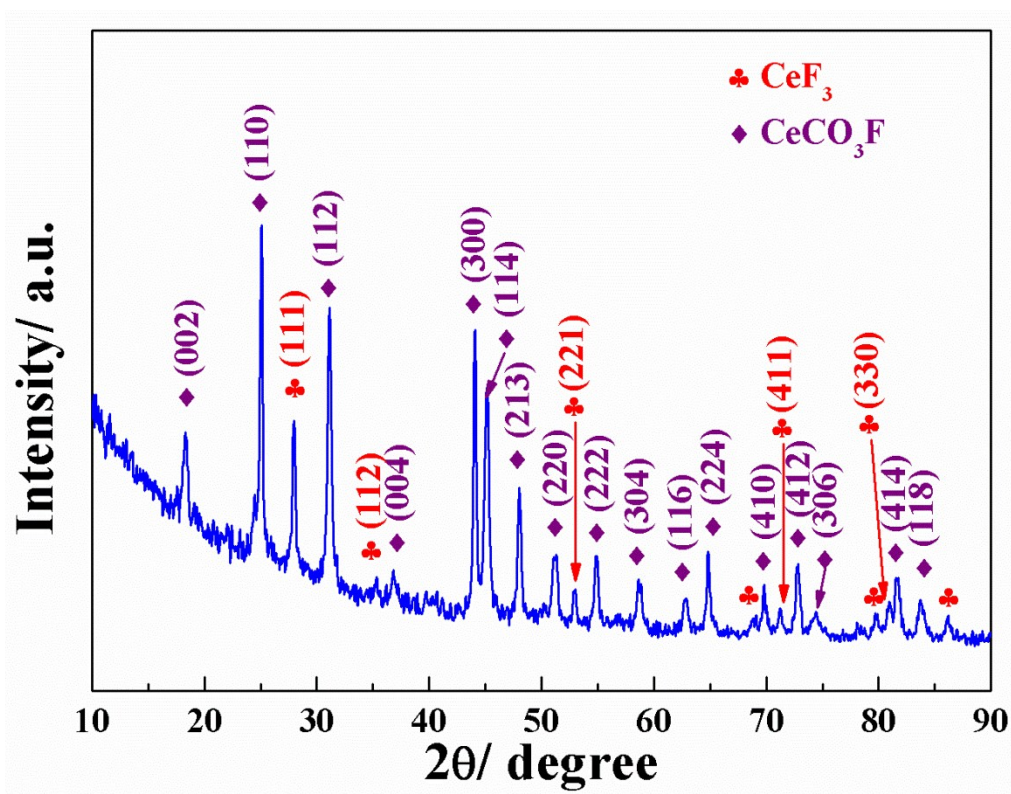

Fig. S4 XRD pattern of samples prepared by hydrothermal method in solution containing  $\text{Ce}(\text{NO}_3)_3$ ,  $\text{NH}_4\text{F}$  and  $\text{CO}(\text{NH})_2$  without nickel foam

Fig. S4 shows XRD pattern of samples prepared by the same hydrothermal method in solution containing  $\text{Ce}(\text{NO}_3)_3$ ,  $\text{NH}_4\text{F}$  and  $\text{CO}(\text{NH})_2$  without nickel foam. The result indicates that the products are  $\text{CeF}_3$  and  $\text{CeCO}_3\text{F}$ , which are totally different from the precursors  $\text{Ni}(\text{OH})_2$  and  $\text{Ce}(\text{OH})_3$  synthesized on the nickel foam.

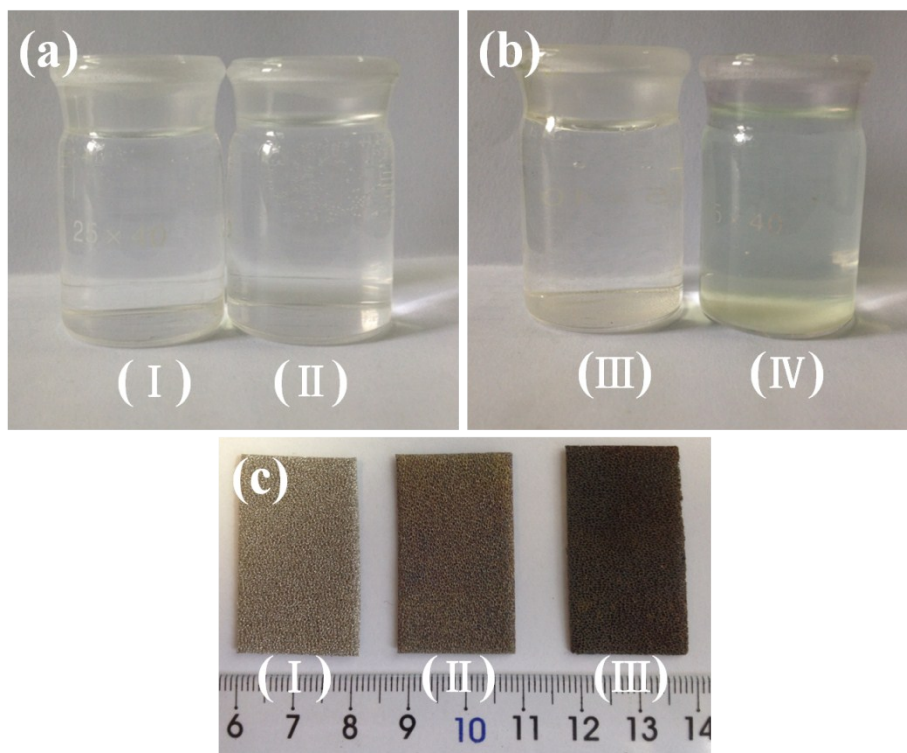

Fig. S5 (a) Reaction solutions contain  $\text{NH}_4\text{F}$  and  $\text{CO}(\text{NH})_2$  before (I) and after (II) hydrothermal reaction. (b) Reaction solutions contain  $\text{Ce}(\text{NO}_3)_3$ ,  $\text{NH}_4\text{F}$  and  $\text{CO}(\text{NH})_2$  before (I) and after (II) hydrothermal reaction. (c) Nickel foam (I), Nickel foam with samples before (II) and after (III) calcinations.

Fig. S5 (a) demonstrates the colour change of hydrothermal reaction solutions only contain  $\text{NH}_4\text{F}$  and  $\text{CO}(\text{NH})_2$  before (I) and after (II) hydrothermal reaction. It is apparent that the colour of hydrothermal reaction solution is still transparent and the same as that before hydrothermal reaction. However, the colour of solutions changes into pale green (as shown in Fig. S5(b)) after hydrothermal reaction with  $\text{Ce}(\text{NO}_3)_3$  in the reaction solution. And the reason for this phenomenon will be explained in the following section. Fig. S5 (c) presents the Nickel foam (I), Nickel foam with samples before (II) and after (III) calcinations, the real samples show different colours at different stage, indicating the successful synthesis of expected  $\text{NiO}/\text{CeO}_2$  hybrid nanoflake arrays.



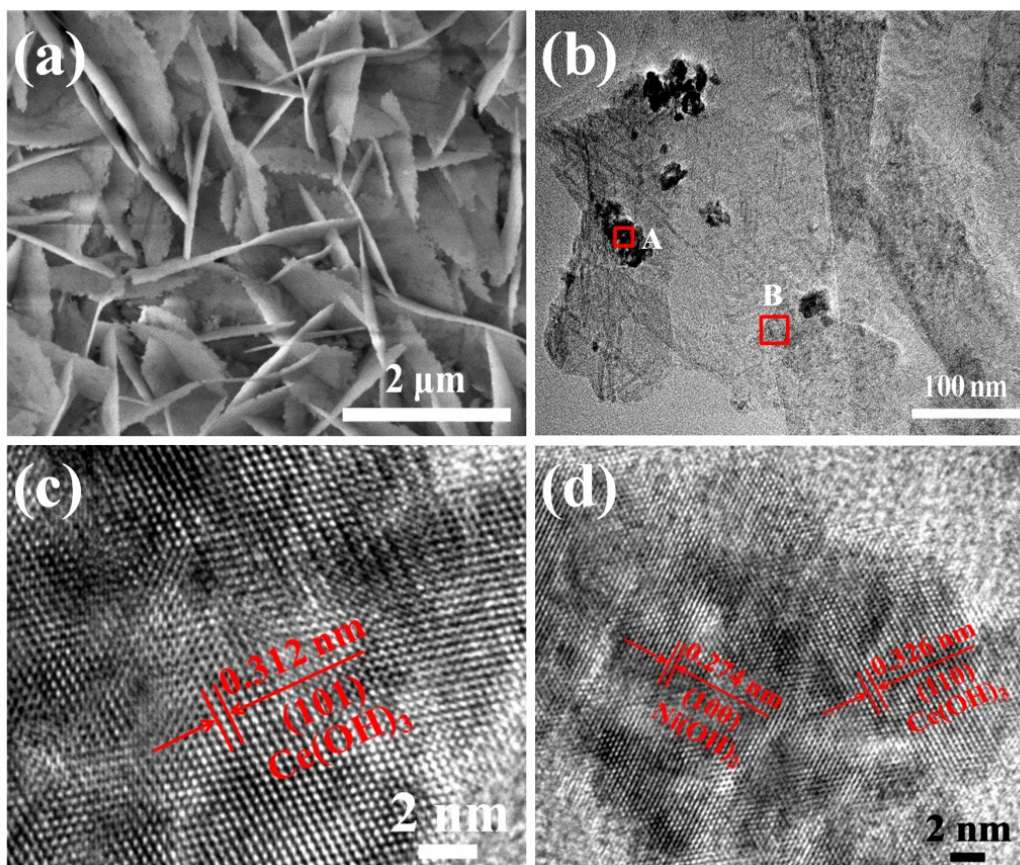

Fig. S6 (a) SEM image of  $\text{Ni(OH)}_2/\text{Ce(OH)}_3$  hybrid NFAs. (b) TEM image of a single  $\text{Ni(OH)}_2/\text{Ce(OH)}_3$  hybrid nanoflake. (c) and (d) are HRTEM images at spots (A) and (B) in Fig. S5(b), respectively.

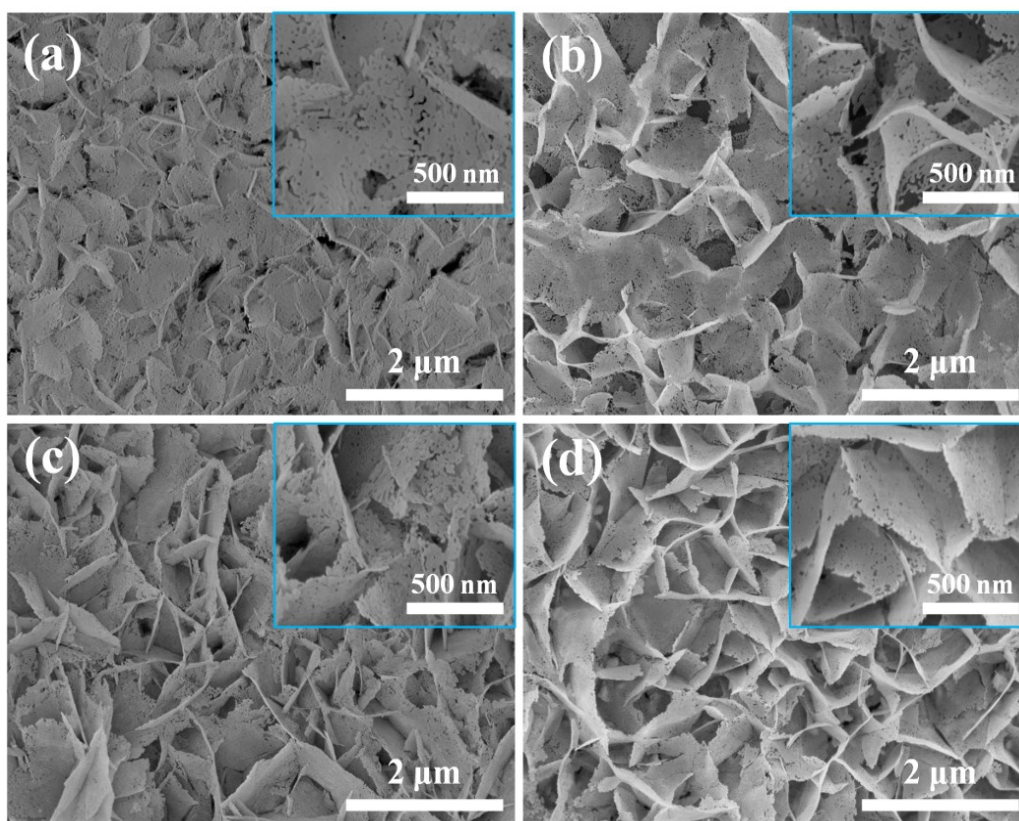

Fig. S7 Influence of  $\text{Ce}(\text{NO}_3)_3$  concentration on the morphology of NiO/CeO<sub>2</sub> hybrid NFAs.  
(a) 0, (b) 5 mM, (c) 10 mM and (d) 15 mM.



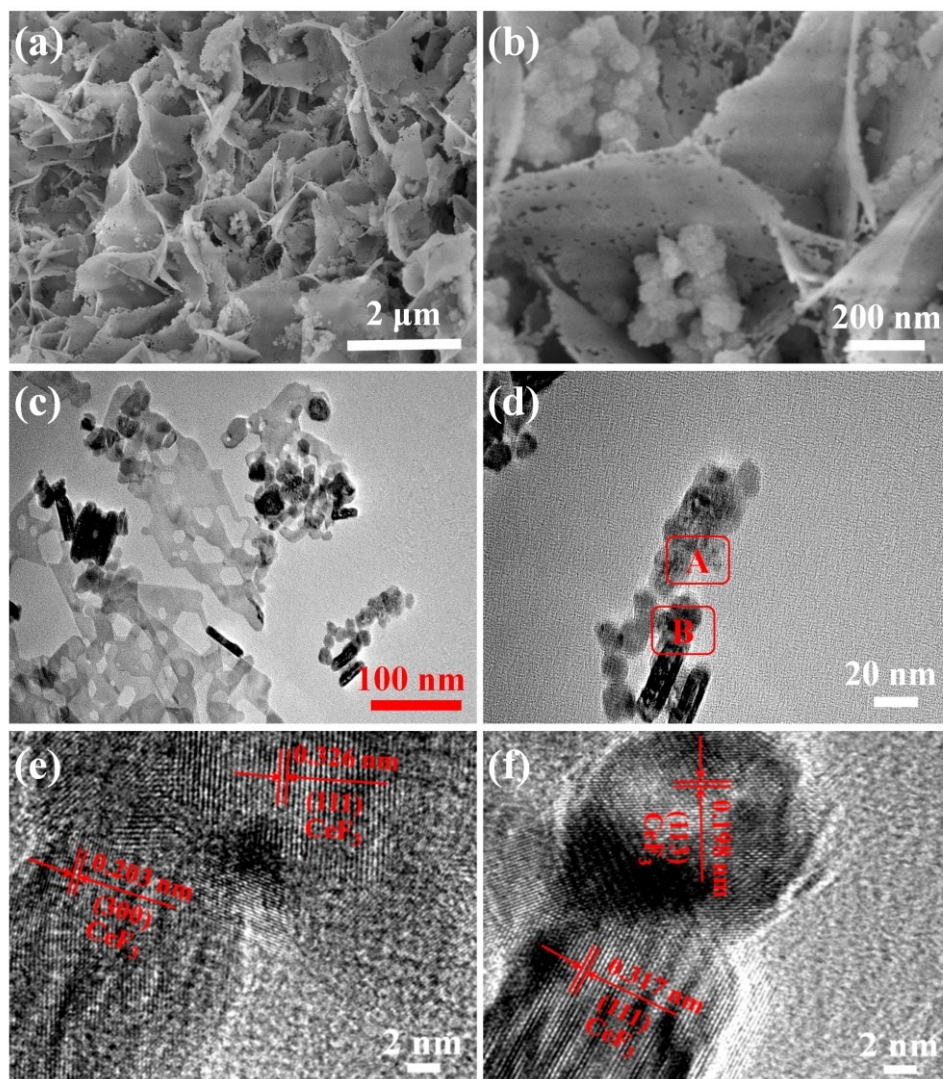

Fig. S8 SEM images of NiO/CeO<sub>2</sub> hybrid NFAs fabricated under high concentration (20 mM) of Ce(NO<sub>3</sub>)<sub>3</sub> with (a) low and (b) high magnification, (c) TEM image of a single NiO/CeO<sub>2</sub> hybrid nanoflake with CeF<sub>3</sub> nanoparticles, (e) and (f) are HRTEM images at spots A and B in Fig. S8(d).

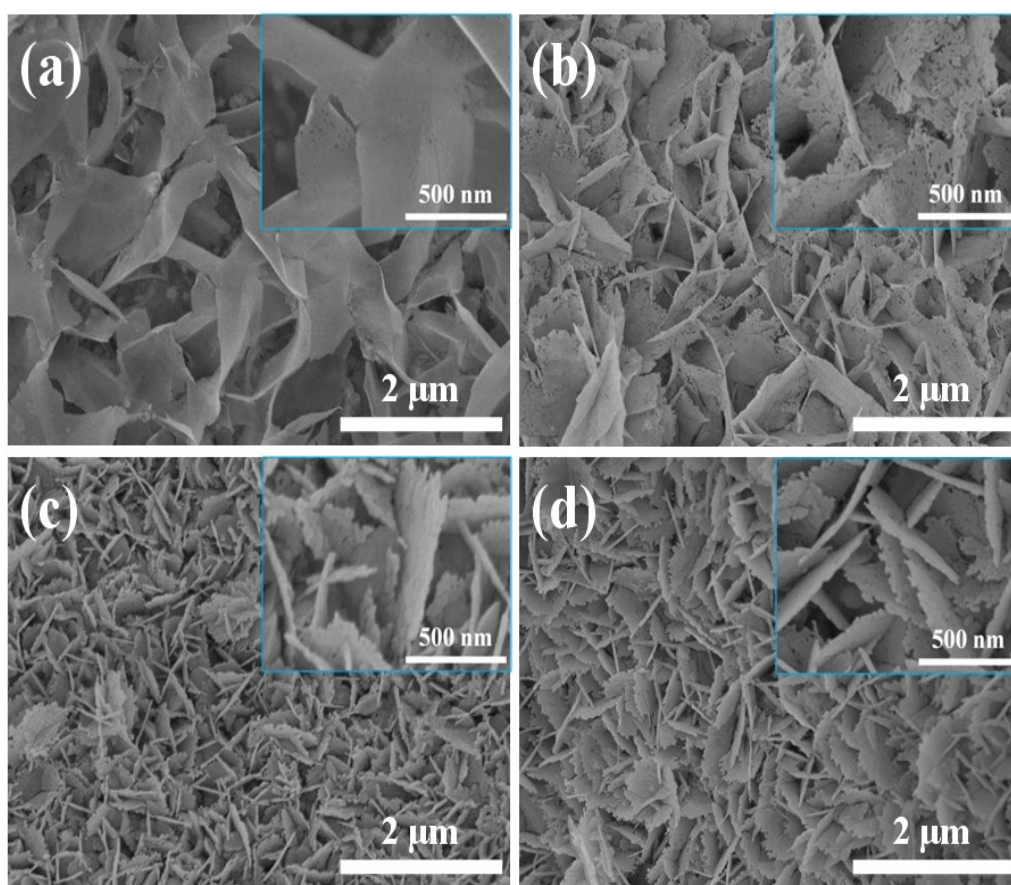

Fig. S9 Influence of hydrothermal temperature on the morphology of NiO/CeO<sub>2</sub> hybrid NFAs. (a) 80°C, (b) 100°C, (c) 120°C and (d) 140°C.

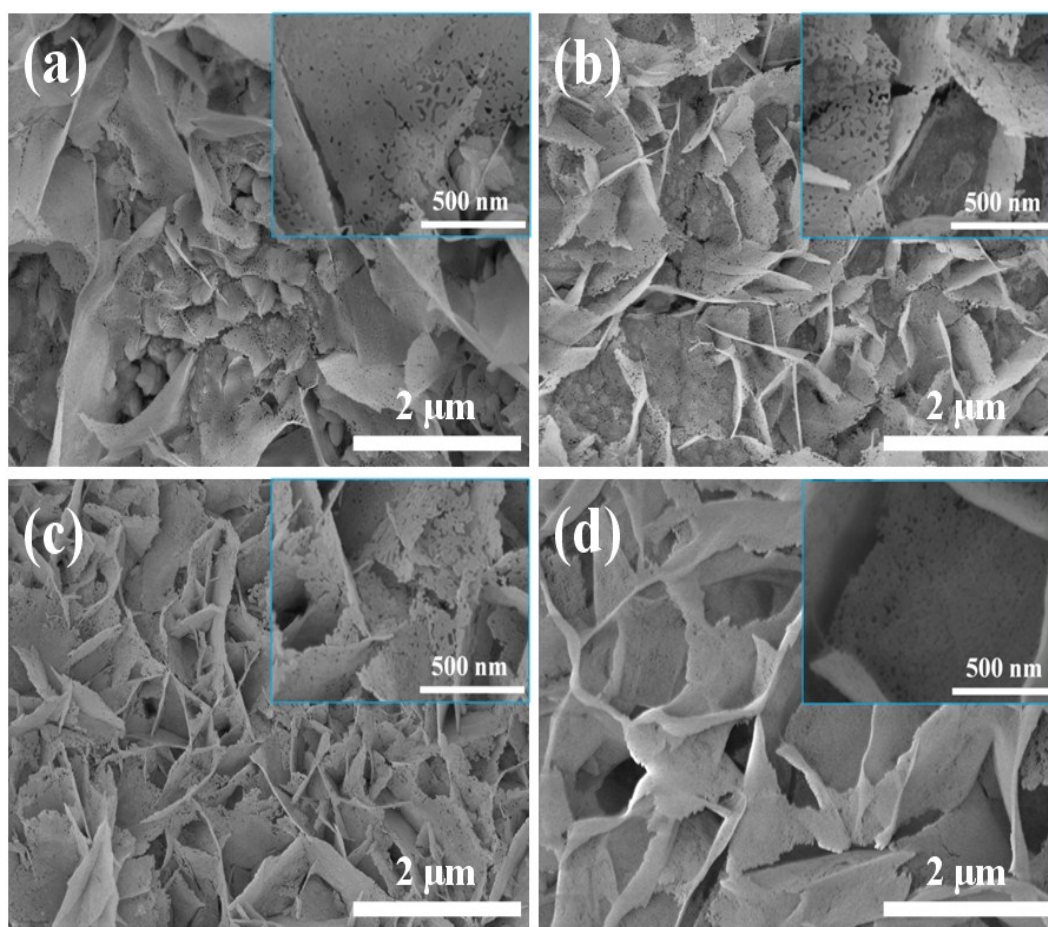

Fig. S10 Influence of hydrothermal time on the morphology of NiO/CeO<sub>2</sub> hybrid NFAs.  
(a) 4 h, (b) 8 h, (c) 12 h and (d) 16 h.



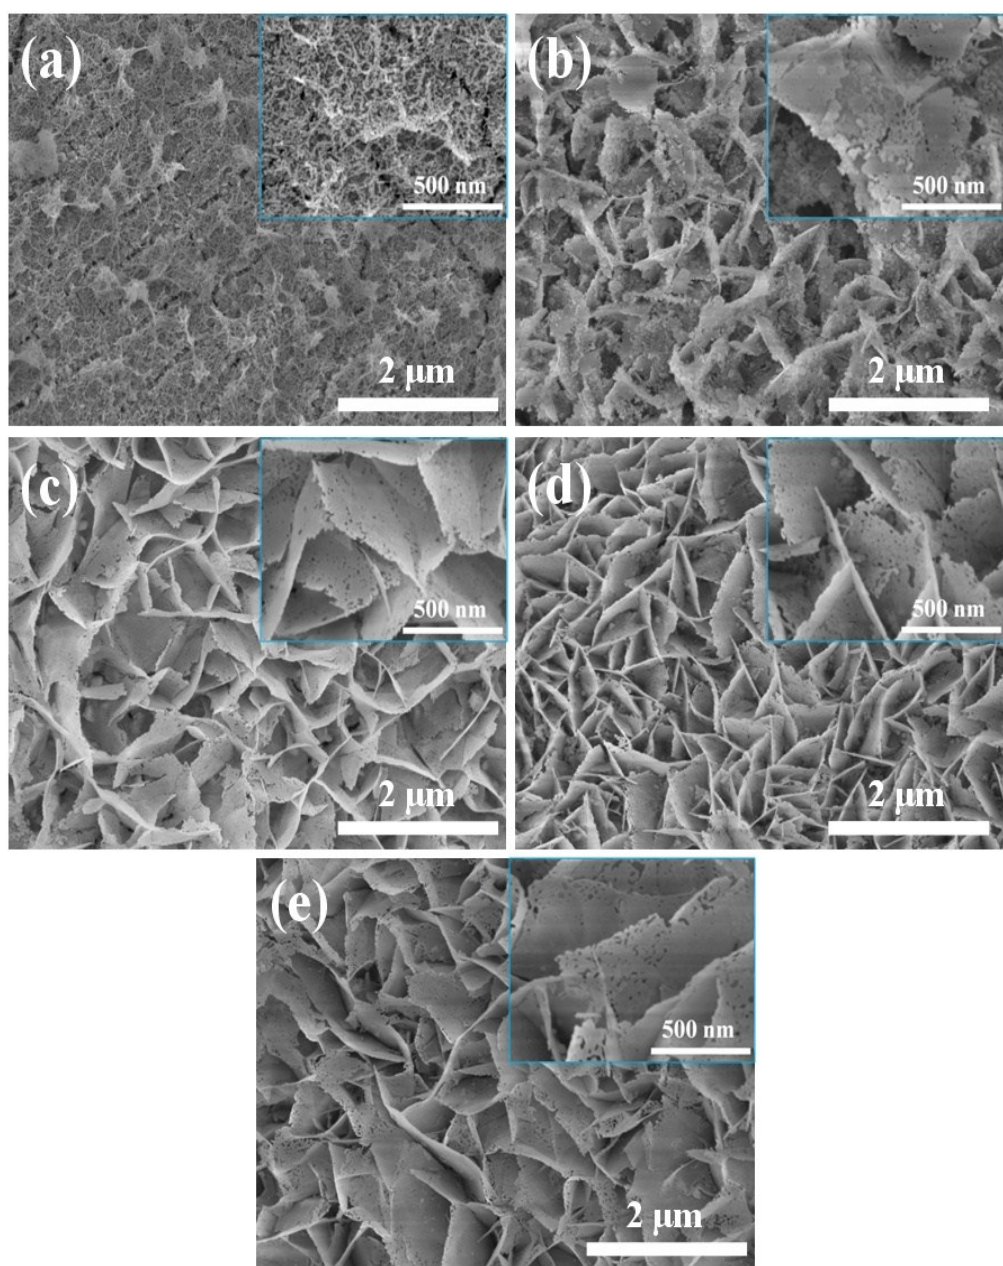

Fig. S11 Influence of  $\text{NH}_4\text{F}$  concentration on the morphology of  $\text{NiO/CeO}_2$  hybrid NFAs.  
 (a) 0, (b) 10 mM, (c) 20 mM, (d) 30 mM and (e) 40 mM.

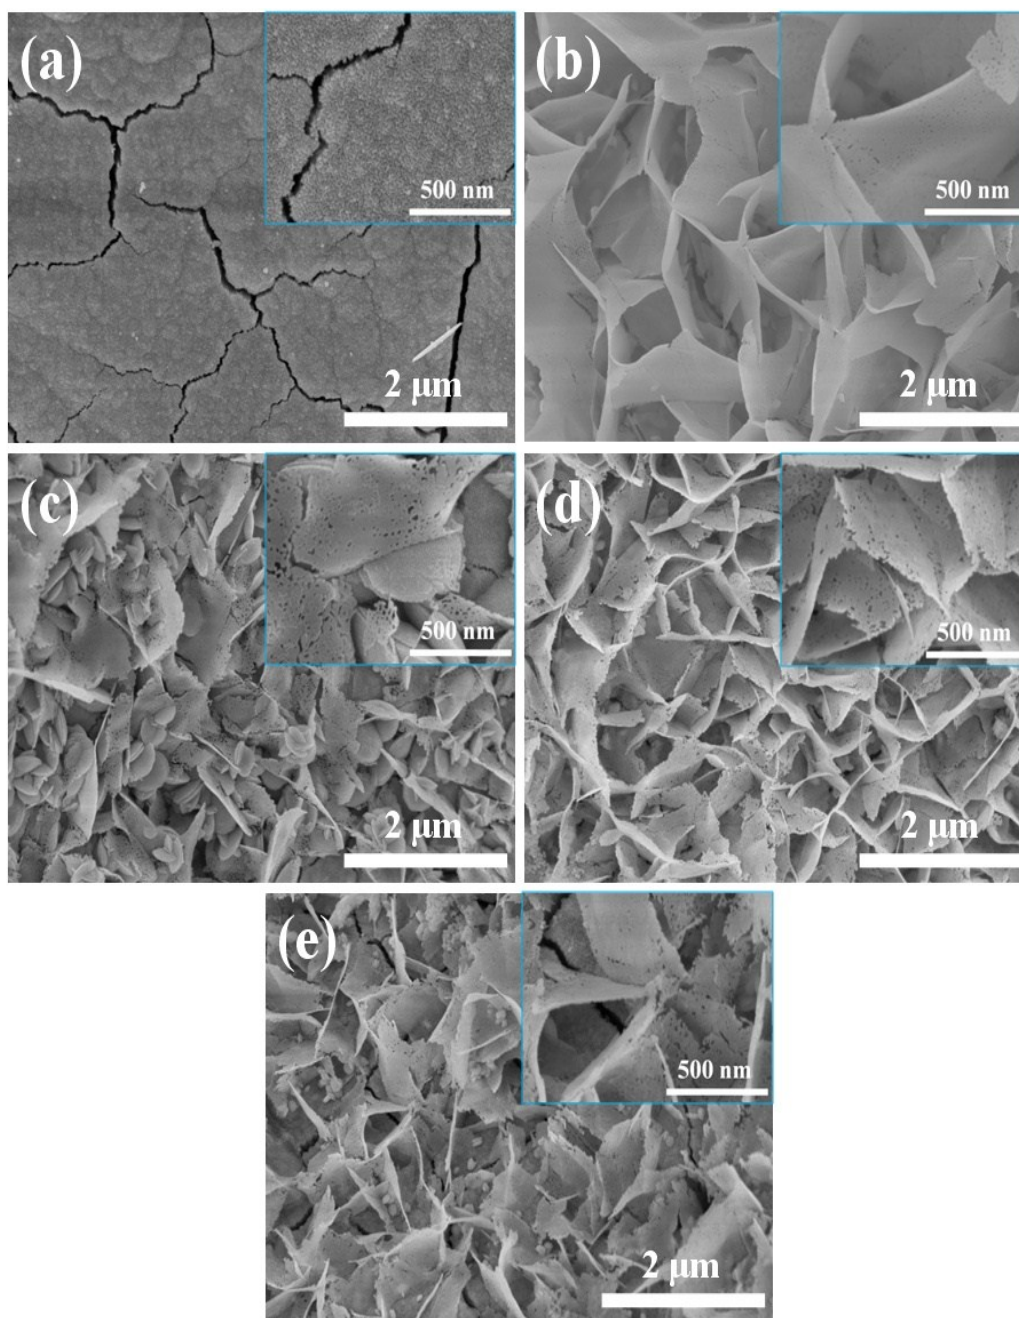

Fig. S12 Influence of CO(NH)<sub>2</sub> on the morphology of NiO/CeO<sub>2</sub> hybrid NFAs.  
 (a) 0, (b) 10 mM, (c) 30 mM, (d) 50 mM and (e) 70 mM.

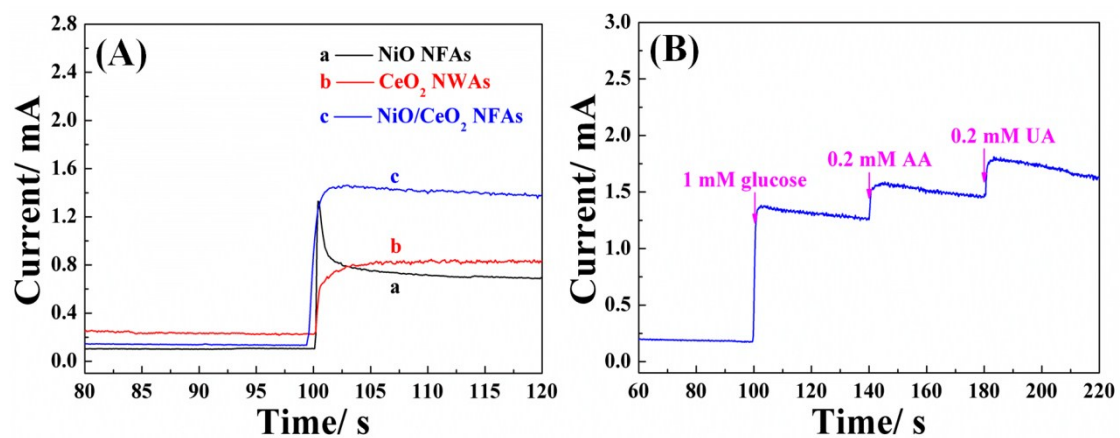

Fig. S13 (A) Amperometric responses of various substrates (a) NiO NFAs, (b) CeO<sub>2</sub> NWAs and (c) NiO/CeO<sub>2</sub> NFAs with injection of 1 mM glucose in 0.1 M NaOH. (B) Anti-interference ability of NiO/CeO<sub>2</sub> NFAs in alkaline solution. Working potential: 0.6 V vs. Ag/AgCl.



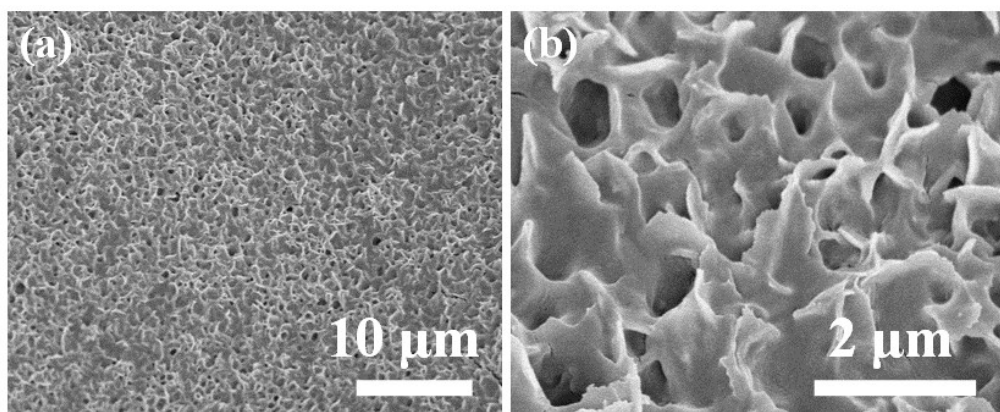

Fig. S14 SEM images of NiO/CeO<sub>2</sub> NFAs after modification with low (a) and high (b) magnification

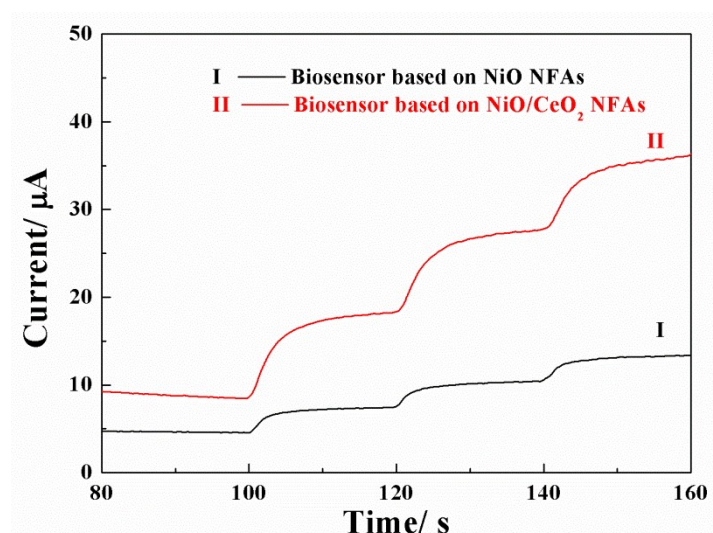

Fig. S15 Typical amperometric responses of glucose biosensors based on NiO and NiO/CeO<sub>2</sub> NFAs measured under the same condition

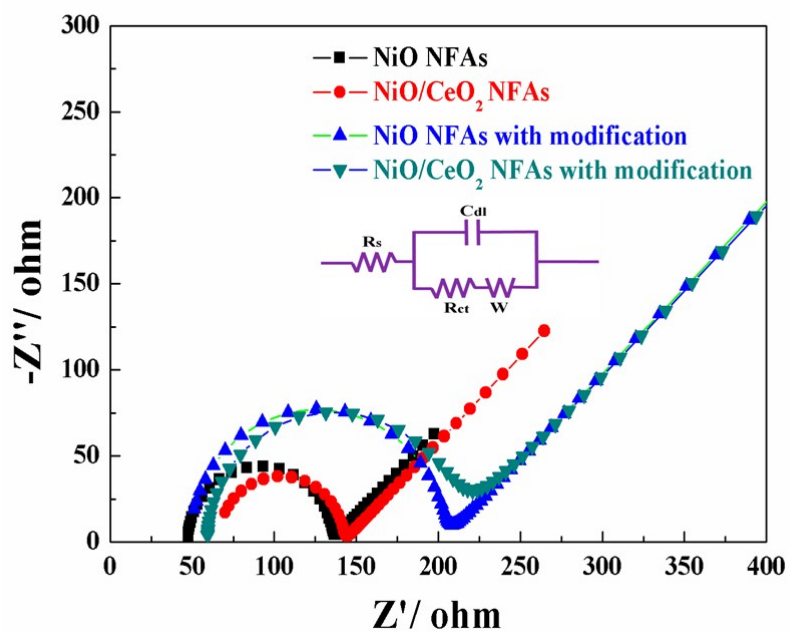

Fig. S16 Nyquist plots of different electrodes in 0.1 M KCl and 5 mM  $K_3Fe(CN)_6$ . Inset is the equivalent circuit used to fit the experimental data.

Table S2 Fitting parameters based on equivalent electrical circuit shown in the inset of Fig. S15 for different EIS plots

| Impedance parameter                         | $R_s/\Omega$ | $R_{ct}/\Omega$ | $CPE/\mu F$ | $W/\Omega$ |
|---------------------------------------------|--------------|-----------------|-------------|------------|
| NiO NFAs                                    | 47.46        | <b>87.49</b>    | 0.544       | 0.014      |
| NiO/CeO <sub>2</sub> NFAs                   | 65.87        | <b>76.16</b>    | 0.111       | 0.0073     |
| NiO NFAs with modification                  | 48.77        | <b>153.6</b>    | 0.103       | 0.003      |
| NiO/CeO <sub>2</sub> NFAs with modification | 59.19        | <b>146</b>      | 0.535       | 0.0013     |

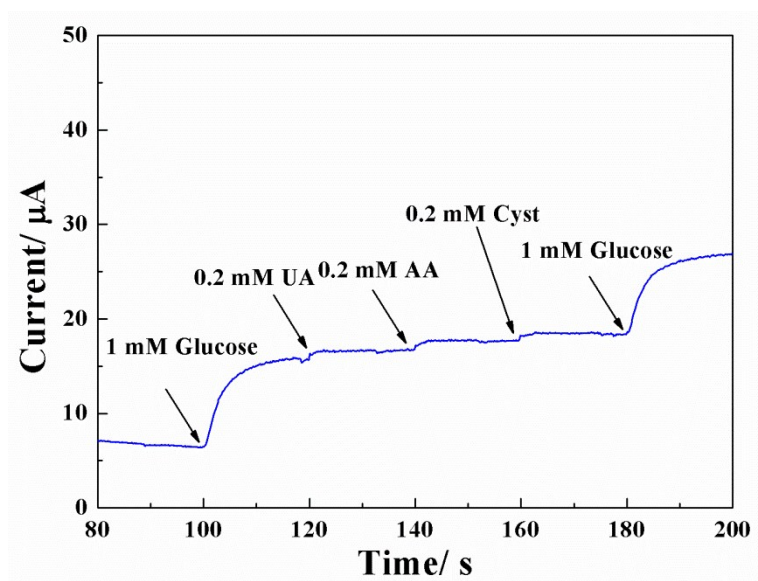

Fig. S17 Anti-interference ability of as-prepared glucose biosensor. Working potential: 0.6 V vs. Ag/AgCl.

Table S3 Comparison of glucose biosensors based on NiO/CeO<sub>2</sub> hybrid NWAs and other representative nanomaterials

| Electrode materials                     | Synthesis approach                                     | Sensitivity<br>$\mu\text{A}\cdot\text{cm}^{-2}\cdot\text{mM}^{-1}$ | Linear range<br>$\mu\text{M}$ | LOD<br>$\mu\text{M}$ | Working potential<br>V | Ref.         |
|-----------------------------------------|--------------------------------------------------------|--------------------------------------------------------------------|-------------------------------|----------------------|------------------------|--------------|
| <b>NiO/CeO<sub>2</sub> NWAs</b>         | <b>One-step Hydrothermal</b>                           | <b>154.4</b>                                                       | <b>1.0-2,900</b>              | <b>1.0</b>           | <b>0.6</b>             | Present work |
| ZnO nanorod array                       | One-step Hydrothermal                                  | 23.1                                                               | 10-3,450                      | 10                   | 0.8                    | 2            |
| ZnO nanotube array                      | Two-step electrochemical/chemical process              | 30.85                                                              | 10-4,200                      | 10                   | 0.8                    | 3            |
| ZnO nanofiber                           | Electrospinning technique                              | 70.2                                                               | 250-19,000                    | 1.0                  | 0.8                    | 4            |
| CeO <sub>2</sub> nanorod                | Electrophoretic deposition                             | 0.165                                                              | 2,000-26,000                  | 100                  | 0.8                    | 5            |
| NiO film                                | RF sputtering technique                                | 101.8                                                              | 1,380-16,660                  | 800                  | /                      | 6            |
| NiO nanosphere                          | Precipitation method                                   | 4.3 $\mu\text{A}\cdot\text{mM}^{-1}$                               | 1,500-7,000                   | 47                   | 0.35                   | 7            |
| MnO <sub>2</sub>                        | Sol-gel process                                        | 24.2                                                               | 0.9-2,730                     | 0.18                 | 0.6 V                  | 8            |
| NiO/ZnO nanorods                        | One-step Hydrothermal                                  | 61.78                                                              | 500-8,000                     | 2.5                  | 0.39                   | 9            |
| AuNP/PB/TiO <sub>2</sub> nanotube array | Anodization + photocatalytic deposition                | 248.0                                                              | 10-700                        | 3.2                  | -0.35                  | 10           |
| ssDNA-SWCNT                             | Layer-by-layer electrostatic self-assembly             | 6 nA·mM <sup>-1</sup>                                              | Up to 94,000                  | 38                   | 0.5                    | 11           |
| MWCNT                                   | Plasma enhanced chemical vapour deposition             | /                                                                  | Up to 30,000                  | 80                   | -0.2                   | 12           |
| RGO                                     | Modified Hummer's method                               | 1.85                                                               | 100-27,000                    | /                    | -0.44                  | 13           |
| GR-CNT-ZnO                              | Modified Hummer's method + Ultrasonication + Reduction | 5.36                                                               | 10-6,500                      | 4.5                  | /                      | 14           |
| GR-PFIL                                 | Modified Hummer's method + Covalent method             | /                                                                  | 2,000-14,000                  | 2,000                | /                      | 15           |
| N-doped GR                              | Modified Hummer's method + Nitrogen Plasma treatment   | /                                                                  | 100-1,100                     | 10                   | -0.15                  | 16           |

Note:

LOD---Limit of Detection

---

SWCNT---Single-wall Carbon nanotube

MWCNT---Multi-wall Carbon nanotube

RGO---Reduced Graphene Oxide

GR--- Graphene

PFIL--- Polyethylenimine-Functionalized Ionic Liquid

---

References:

1. J. W. Cui, S. B. Adeloju, Y. C. Wu, *Anal. Chim. Acta*, 2014, 809,134.
2. A. Wei, X. Sun, J.X. Wang, Y. Lei, X.P. Cai, C.M. Li, Z. Dong, *Appl. Phys. Lett.*, 2006, 89, 123902.
3. K. Yang, G. W. She, H. Wang, X. M. Ou, X. H. Zhang, C. S. Lee, S. T. Lee,*J. Phys. Chem. C*, 2009, 113,20169.
4. M. Ahmad, C. F. Pan, Z. X. Luo, J. Zhu,*J. Phys. Chem. C*, 2010, 114, 9308.
5. D. Patil, N. Q. Dung, H. Jung, S. Y. Ahn, D. M. Jang, D. Kim, *Biosens. Bioelectron.*, 2012, 31, 176-181.
6. M. Tyagi, M. Tomar, V. Gupta, *Anal. Chim. Acta*, 2012, 726, 93.
7. C. C. Li, Y. L. Liu, L. M. Li, Z. F. Du, S. J. Xu, M. Zhang, X. M. Yin, T. H. Wang, *Talanta*, 2008, 77, 455.
8. J. J. Yu, T. Zhao, B. Z. Zeng, *Electrochem. Commun.*, 2008, 10, 1318.
9. X. F. Chu, X. H. Zhu, Y. P. Dong, T. Y. Chen, M. F. Ye, W. Q. Sun, *J. Electroanal. Chem.*, 676, 2012, 20.
10. Z. D. Gao, Y. F. Ou, T. T. Li, N. K. Shrestha, Y. Y. Song, *Sci. Rep.*, 2014, 4, 6891.
11. Z. Kang, X. Q. Yan, Y. Zhang, J. Pan, J. Shi, X. H. Zhang, Y. Liu, J. H. Choi, D. M. Porterfield, *ACS Appl. Mater. Interfaces*, 2014, 6, 3784.
12. Y. H. Lin, F. Lu, Y. Tu, Z. F. Ren, *Nano Lett.*, 2004, 4, 191.
13. B. Unnikrishnan, S. Palanisamy, S. M. Chen, *Biosens. Bioelectron.*, 2013, 39, 70.
14. K. Y. Hwa, B. Subramani, *Biosens. Bioelectron.*, 2014, 62, 127.
15. C. S. Shan, H. F. Yang, J. F. Song, D. X. Han, A. Ivaska, L. Niu, *Anal. Chem.* 2009, 81, 2378.
16. Y. Wang, Y. Y. Shao, D. W. Matson, J. H. Li, Y. H. Lin, *ACS Nano*, 2010, 4,1790.
